# Supplementary material for: Mutant GDF5 enhances ameloblast differentiation via accelerated BMP2-induced Smad1/5/8 phosphorylation
Source: PubMed Central journal article supplement (PMC4814822; doi:10.1038/srep23670), 2016-03-31
Supplement: srep23670-s1.pdf [file srep23670-s1.pdf]

**Mutant GDF5 enhances ameloblast differentiation via accelerated BMP2-induced Smad1/5/8 phosphorylation**

Jia Liu<sup>1 2 3 ‡</sup>, Kan Saito<sup>2 ‡ \*</sup>, Yuriko Maruya<sup>2, 4 ‡</sup>, Takashi Nakamura<sup>2</sup>, Aya Yamada<sup>2</sup>, Emiko Fukumoto<sup>2</sup>, Momoko Ishikawa<sup>2</sup>, Tsutomu Iwamoto<sup>2</sup>, Kanako Miyazaki<sup>5</sup>, Keigo Yoshizaki<sup>5</sup>, Lihong Ge<sup>1 \*</sup>, Satoshi Fukumoto<sup>2</sup>

# Supplemental figure

a

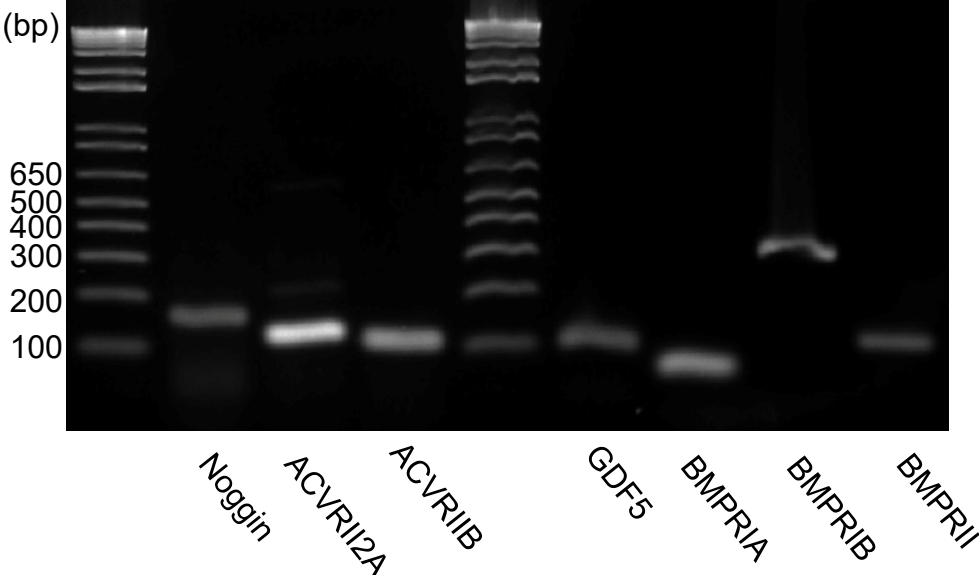

# Supplemental figure

**b**

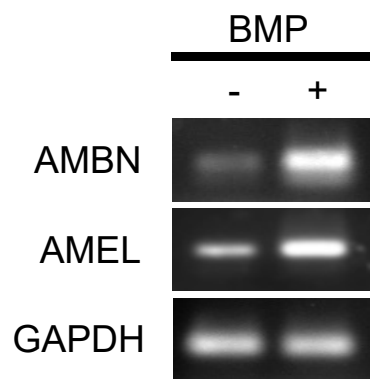

# Supplemental figure

c

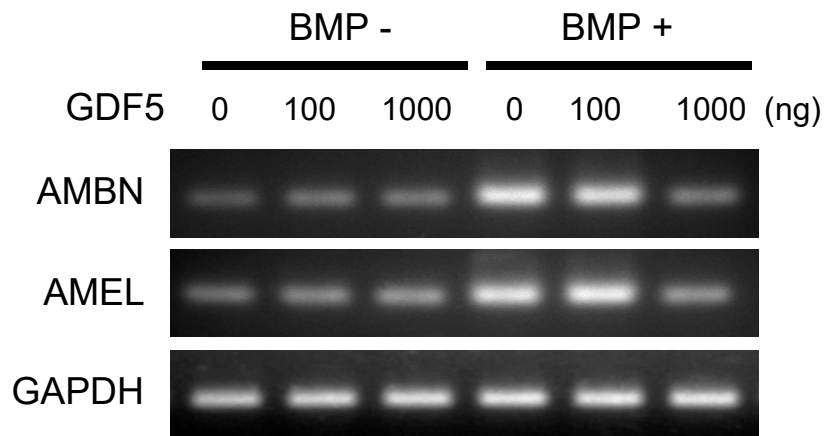

**Supplemental figure. Electrophoretic pattern of RT-PCR.** The results for GDF5, BMPRs, ACVRs and noggin expressions in mouse tooth germ cells from E13 to P7 were confirmed by electrophoresis (a). SF2 cells were cultured with 100ng/ml BMP2 for 24 h, and the expression of AMEL and AMBN was analysed by RT-PCR (b). SF2 cells were cultured with 0, 100 ng/ml BMP2 and 0-1000 ng/ml GDF5 for 24 h. AMEL and AMBN expression was detected by RT-PCR (c).
